- assess the safety, pharmacokinetics, and efficacy of a 30-minute infusion in healthy male volunteers. *Anesth Analg* 2015; 121:885–93
22. Li Y, Flood P, Cornes S: Electroencephalography of seizure-like movements during general anesthesia with propofol: Seizures or nonepileptic events? *A A Case Rep* 2015; 5:195–8
  23. Gooding JM, Corssen G: Effect of etomidate on the cardiovascular system. *Anesth Analg* 1977; 56:717–9
  24. Ebert TJ, Muzi M: Sympathetic hyperactivity during desflurane anesthesia in healthy volunteers. A comparison with isoflurane. *ANESTHESIOLOGY* 1993; 79:444–53
  25. Choi SD, Spaulding BC, Gross JB, Apfelbaum JL: Comparison of the ventilatory effects of etomidate and methohexital. *ANESTHESIOLOGY* 1985; 62:442–7
  26. Blouin RT, Conard PF, Gross JB: Time course of ventilatory depression following induction doses of propofol and thio-pental. *ANESTHESIOLOGY* 1991; 75:940–4
  27. Hermann DJ, Egan TD, Muir KT: Influence of arteriovenous sampling on remifentanyl pharmacokinetics and pharmacodynamics. *Clin Pharmacol Ther* 1999; 65:511–8
  28. Schnider TW, Minto CF, Gambus PL, Andresen C, Goodale DB, Shafer SL, Youngs EJ: The influence of method of administration and covariates on the pharmacokinetics of propofol in adult volunteers. *ANESTHESIOLOGY* 1998; 88:1170–82
  29. Bruhn J, Myles PS, Sneyd R, Struys MM: Depth of anaesthesia monitoring: What's available, what's validated and what's next? *Br J Anaesth* 2006; 97:85–94

## ANESTHESIOLOGY REFLECTIONS FROM THE WOOD LIBRARY-MUSEUM

### Clean Analgesia? A Civil War Tin for Pills of Opium...and Soap

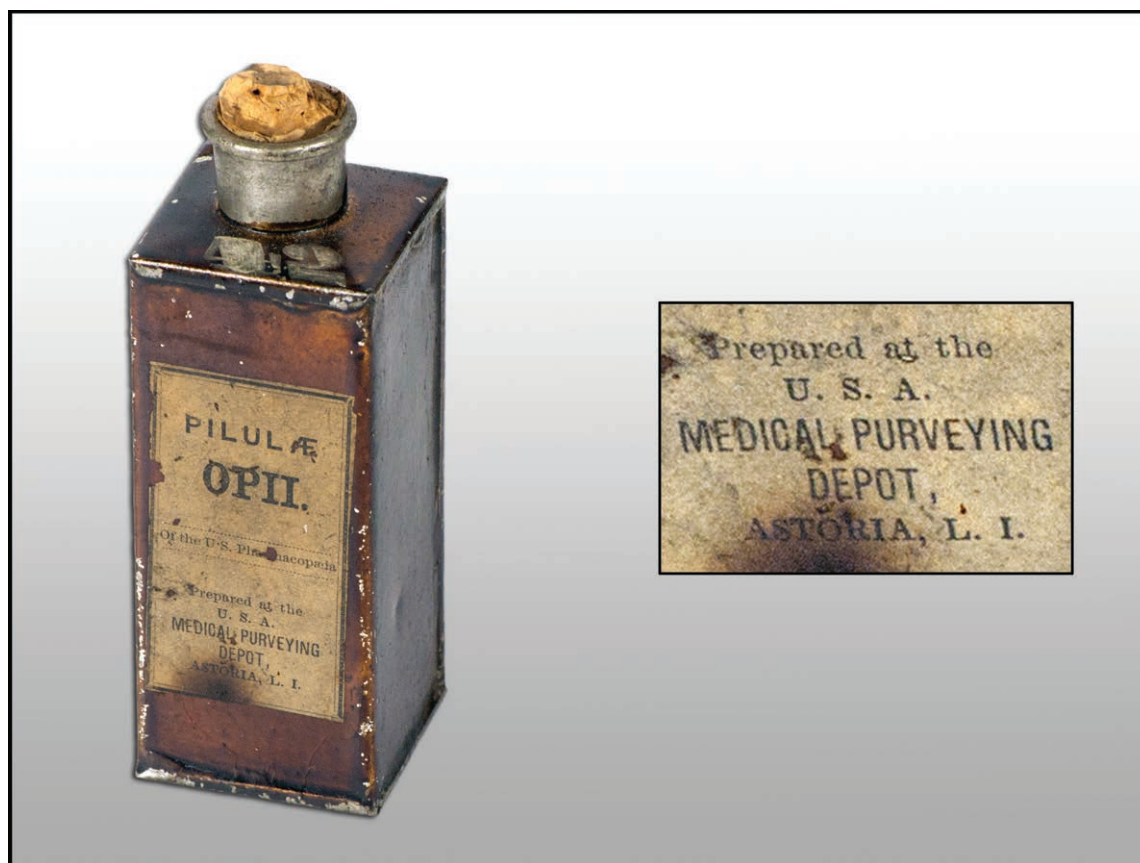

For small-scale production of opium pills during America's Civil War, a drachm (3.89 g) of the powdered drug was mixed with 12 grains (0.72 g) of hard dry soap and molded with a dash of water into a cylindrical mass for division into 60 pills. However, the Union Army required a much more industrial scale of pill rolling. At its Medical Purveying Depot in Astoria, Long Island, New York, the Union Army employed 12 women to roll out an average totaling 60,000 opium pills daily. Men working the nearby printing press generated paper labels (*right*) for the japanned tins (*left*) that were corked after being filled with *Pilulae Opii* (Latin: little balls or pills of opium). The soap was considered an “excipient” or inert filler for the analgesic opium. Remarkably, soap was so routinely compounded with opium that, to conceal from patients that they were receiving opium, a physician could simply prescribe opium as *Pilulae Saponis Compositae* or “Compound Pills of Soap.” (Copyright © the American Society of Anesthesiologists' Wood Library-Museum of Anesthesiology.)

George S. Bause, M.D., M.P.H., *Honorary Curator and Laureate of the History of Anesthesia*, Wood Library-Museum of Anesthesiology, Schaumburg, Illinois, and Clinical Associate Professor, Case Western Reserve University, Cleveland, Ohio. UJYC@aol.com.
